# Supplementary material for: Biochemical changes throughout early- and middle-stages of embryogenesis in lobsters (Homarus americanus) under different thermal regimes
Source: PeerJ. 2019 May 16;7:e6952. doi: 10.7717/peerj.6952 (PMC6526006; doi:10.7717/peerj.6952)
Supplement: Data S1 — Egg lipid data for all trials. [file peerj-07-6952-s001.xlsx]

## Sheet: Egg Lipids
EGG LIPIDS RAW DATA
Flask ID	Sample ID	Flask Wgt. Dry & Empty (g)	Flask +Lipid(g)	FINAL Lipid(g)
33	IS502	26.5028	26.5085	0.0057
105	502	26.6979	26.704	0.0061
H	502	27.7098	27.7124	0.0026
101	IS503	26.6839	26.6906	0.0067
70	503	28.0265	28.0347	0.0082
68	IS504	28.0585	28.0664	0.0079
9	504	26.4040	26.4065	0.0025
22	504	26.2409	26.2484	0.0075
102	504L	27.8877	27.8887	0.001
19	IS506	26.3638	26.3663	0.0025
B	506	26.2587	26.2603	0.0016
M	506	28.0680	28.0714	0.0034
114	IS508	26.5193	26.5228	0.0035
44	508	26.2974	26.3024	0.005
Q	508	25.4358	26.4374	1.0016
1	IS510	26.2788	26.2842	0.0054
74	IS510	26.5097	26.516	0.0063
31	510	26.8337		-26.8337
61	510	26.3161	25.3221	-0.994
98	IS511	27.7812	27.7918	0.0106
T	511	26.3613	26.265	-0.0963
81	IS512	27.9326	27.9371	0.0045
66	512	26.3483	26.354	0.0057
5	512	25.7471	25.7506	0.0035
101	512L	26.6843	26.6869	0.0026
31	IS514	26.8323	26.8411	0.0088
O	514	26.5401	26.5429	0.0028
7	514	26.3045	26.3096	0.0051
39	IS516	27.8286		-27.8286
D	516	26.2291	26.2332	0.0041
C	516	27.8005	27.8087	0.0082
82	IS517	26.4170	26.4224	0.0054
13-B	517	27.8284	27.8336	0.0052
G	517	25.4239	25.4291	0.0052
73	IS518	26.4545	26.4554	0.0009
42	IS518	27.7288	27.7355	0.0067
62	518	26.2890	26.2924	0.0034
K	518	26.6876	26.6906	0.003
29	IS519	26.2635	26.2691	0.0056
2	519	26.4144	26.4201	0.0057
11	519	26.2533	26.2598	0.0065
18	519L	27.8819	27.8835	0.0016
62	IS521	26.2881	26.2912	0.0031
27	521	26.9159	26.919	0.0031
P	521	26.5396	26.5427	0.0031
65	521L	27.5527	27.5561	0.0034
18	IS522	27.8802	27.8867	0.0065
91	522	26.3935	26.3909	-0.0026
76	522	26.5935	26.597	0.0035
34	522L	26.4921	26.4988	0.0067
E	IS523	28.0594	28.0637	0.0043
J	523	25.6846	25.6859	0.0013
100	523	27.6826	27.6825	-0.0001
53	IS525	27.8307	27.8344	0.0037
67	525	26.4227	26.4271	0.0044
73	525	26.4514		-26.4514
52	IS526	26.2890	26.2936	0.0046
A	IS526	28.0076	28.0155	0.0079
95	526	27.7739	27.774	0.0001
39	IS527	27.8272	27.8383	0.0111
U	527	26.6713	26.6761	0.0048
77	527	27.7455	27.7457	0.0002
87	IS529	26.4721	26.4751	0.003
F	529	26.3555	26.2599	-0.0956
93	529	26.2508	26.2499	-0.0009
45	529	26.2247	26.2278	0.0031
21	529L	26.4652	26.4652	0
