# Supplementary material for: Biochemical changes throughout early- and middle-stages of embryogenesis in lobsters (Homarus americanus) under different thermal regimes
Source: PeerJ. 2019 May 16;7:e6952. doi: 10.7717/peerj.6952 (PMC6526006; doi:10.7717/peerj.6952)
Supplement: Data S2 — Egg protein data for all trials. [file peerj-07-6952-s002.xlsx]

## Sheet: Egg Proteins
EGG PROTEIN -- RAW DATA
Lobster	Reading A	Reading B	Protein	(ug/ml)
15 L	0.713	0.683	550.497	526.168
11 L	0.745	0.688	577.961	531.086
64 L	0.679	0.645	523.684	495.724
46 L	0.601	0.684	459.539	527.796
46 L	0.553	0.638		484.475
GF	0.76	0.718	590.296	555.757
19 L	0.694	0.634	536.02	486.678
189 L	0.667	0.716	513.816	554.112
176 L	0.701	0.74	541.776	573.849
163 L	0.816	0.625		479.276
163 L	0.556	0.621	419.188	470.939
G L	0.659	0.524	507.237	396.217
G L	0.581	0.748	439.092	572.054
28 L	0.873	0.84	671.576	645.303
OF L	0.59	0.552	450.493	419.243
94 L	0.557	0.437	423.355	324.671
94 L	0.57	0.458	430.334	341.162
197 L	0.591	0.612	451.316	468.586
164 L	0.656	0.62	504.77	475.164
112L	0.632	0.688	485.033	531.086
122 L	0.705	0.67	545.066	516.283
64 2/07	0.839	0.778	651.759	602.395
64 5/07	0.752	0.713	581.355	549.795
94 2/07	0.717	0.698	553.032	537.656
94 5/07	0.719	0.674	554.65	518.235
28 2/07	0.868	0.778	675.227	602.395
28 2/07	0.852	0.809	654.857	620.621
28 5/07	0.772	0.796	597.54	616.962
46 10/06	0.669	0.748	514.189	578.118
46 10/06	0.724	0.663	552.946	504.379
46 2/07	0.815	0.838	632.337	650.95
46 5/07	0.746	0.757	576.5	585.401
15 10/06	0.732	0.793	565.17	614.534
15 2/07	0.764	0.756	591.066	584.592
15 5/07	0.721	0.729	556.269	562.743
11 10/06	0.824	0.82	639.62	636.383
11 2/07	0.815	0.851	632.337	661.47
11 5/07	0.809	0.802	627.482	621.817
G 11/06	0.835	0.861	648.522	669.562
BF 12/06	1.026	0.967	817.573	770.559
169F 11/06	0.948	0.825		657.405
169F 11/06	0.8	0.825	613.455	633.36
BF2 2/07	1.02	1.033	812.792	823.151
GF 12/06	0.972	1.071	774.543	853.432
GF 2/07	0.988	0.924	787.293	736.294
GF 2/07	1.028	0.968	819.167	771.356
GF 5/07	0.995	0.932	792.871	742.669
GF 5/07	0.932	0.976	742.669	777.731
175 F 11/06	0.939	0.96	697.157	713.381
175 F 2/07	0.96	0.979	713.381	728.059
164 F 12/06	0.924	0.865	685.569	639.988
164 F 2/07	0.941	0.871	698.702	644.623
172 F 12/06	0.722	0.683	529.512	499.382
172 F 2/07	0.713	0.87	522.559
172 F 2/07	0.693	0.715	552.221	569.751
185 11/06	0.57	0.906		671.663
185 11/06	0.89	0.907	709.201	722.748
72 F 11/06	0.625	0.683	454.574	499.382
164 F 5/07	0.869	0.815	668.392	625.398
PF 12/06	0.771	0.663	567.367	483.931
PF 12/06	0.618	0.691	468.551	526.672
PF 2/07	1.088	0.764		561.959
PF 2/07	0.729	0.746	556.927	570.462
OF 11/06	1.007	0.998	809.273	801.63
OF 12/06	0.534	0.868		691.236
OF 12/06	0.945	0.575	728.901
OF 2/07	0.667	0.636	487.021	463.072
OF 5/07	0.789	0.729	581.273	534.92
BF 11/06	0.872	0.808	645.396	595.952
127 2/07	0.746	0.547	554.266	398.212
127 2/07	0.531	0.703	399.283	536.226
67F 12/06	0.87	0.908	651.506	681.305
67F 2/07	0.88	0.909	659.348	682.089
52 F 11/06	0.805	0.839	600.533	627.196
52 F 2/07	0.888	0.807	665.621	602.102
51 F 12/06	0.849	0.829	635.038	619.354
51 F 2/07	0.747	0.87	555.05	651.506
51 F 2/07	0.717	0.871	547.373	669.984
51 F 5/07	0.823	0.772	614.649	574.655
21 F 12/06	0.691	0.695	511.136	514.272
21 F 2/07	0.739	0.715	548.777	529.956
21 F 5/07	0.683	0.682	504.862	504.078
176 F 12/06	0.904	0.853	678.168	638.174
176 F 2/07	0.794	0.788	591.907	587.202
176 F 5/07	0.85	0.854	635.822	638.959
G 2/07	0.8	0.923	615.467	713.73
G 2/07	0.913	0.79	703.424	605.494
G 2/05	0.78	0.768	599.489	589.902
189 10/06	0.767	0.763	589.103	585.908
189 2/07	0.728	0.73	557.946	559.544
189 5/07	0.767	0.664		506.817
189 5/07	0.711	0.659	542.596	501.194
197 10/06	0.977	0.865	756.87	667.395
197 10/06	0.767	0.926		713.774
197 2/07	0.796	0.803	612.271	617.863
197 5/07	0.823	0.858	633.841	661.802
155 10/06	0.742	0.78	569.131	599.489
155 2/07	0.819	0.775	630.646	595.494
155 5/07	0.753	0.847	577.919	653.014
155 5/07	0.728	0.828		635.748
163 10/06	0.744	0.755	570.729	579.516
163 2/07	0.807	0.721	621.059	552.354
163 2/07	0.709	0.819	541.003	628.583
163 5/07	0.674	0.738	514.806	565.935
127 10/06	0.602	0.607	457.286	461.28
11 10/06	0.651	0.611	500.216	467.777
11 2/07	0.815	0.832	646.23	660.666
11 5/07	0.614	0.62	470.21	475.076
19 2/07	0.757	0.804	586.181	624.297
19 5/07	0.706	0.806	544.821	625.919
19 5/07	0.712	0.743	543.392	568.073
126 10/06	0.806	0.849	625.919	660.792
126 2/07	0.77	0.685	596.724	527.79
126 2/07	0.756	0.695	596.128	544.327
126 5/07	0.771	0.725	597.535	560.229
122 11/06	0.697	0.743	537.522	574.827
122 12/06	0.756	0.829	585.37	644.572
122 2/07	0.667	0.801	513.192	621.864
122 2/07	0.637	0.785	483.678	601.513
122 5/07	0.721	0.72	556.985	556.174
64 10/06	0.783	0.773	607.266	599.157
