# Supplementary material for: Biochemical changes throughout early- and middle-stages of embryogenesis in lobsters (Homarus americanus) under different thermal regimes
Source: PeerJ. 2019 May 16;7:e6952. doi: 10.7717/peerj.6952 (PMC6526006; doi:10.7717/peerj.6952)
Supplement: Data S3 — Egg volume data for all trials. [file peerj-07-6952-s003.xls]

## Sheet: Egg Volumes
EGG VOLUMES -- RAW DATA
Egg ID	% D	Dcode	eggV
102	25.2632	2006-09-05	2555.67
102	26.2281	2006-09-05	2250.37
102	27.3684	2006-09-05	2872.73
102	21.0526	2006-09-05	2555.67
102	21.1404	2006-09-05	2679.53
102	26.4912	2006-09-05	2072.74
102	23.5088	2006-09-05	2766.67
102	27.7193	2006-09-05	2867.85
102	26.2281	2006-09-05	2256.6
102	42.2807	2006-11-05	3709.29
102	43.2456	2006-11-05	2831.43
102	38.9474	2006-11-05	3677.54
102	46.6667	2006-11-05	3294.56
102	47.1053	2006-11-05	2826.6
102	46.0526	2006-11-05	4064.45
102	42.4561	2006-11-05	3220.25
102	50.2632	2006-11-05	3479.77
102	48.1579	2006-11-05	3238.72
102	49.2982	2006-11-05	3510.36
102	51.9298	2006-01-06	2359.96
102	62.6316	2006-01-06	2416.06
102	56.7544	2006-01-06	2954.03
102	54.386	2006-01-06	2585.13
102	58.1579	2006-01-06	3606.07
102	58.6842	2006-01-06	3257.26
102	58.0702	2006-01-06	2714.63
102	58.3333	2006-01-06	3305.27
102	61.9298	2006-01-06	3067.34
102		2006-02-06	3628.84
102	74.386	2006-02-06	3717.98
102	63.4211	2006-02-06	4123.18
102	74.8246	2006-02-06	3978.93
102	71.9298	2006-02-06	3668.92
102	74.1228	2006-02-06	3906.59
156	40.4386	2006-11-05	5423.2
156	43.2456	2006-11-05	4089.11
156	39.7368	2006-11-05	4680.74
156	37.8947	2006-11-05	4704.44
156	45.4386	2006-11-05	5144.77
156	38.4211	2006-11-05	3380.87
156	42.4561	2006-11-05	3637.4
156	40.4386	2006-11-05	3900.6
156	37.0175	2006-11-05	3864.8
156	43.5088	2006-11-05	3858.85
156	58.0702	2006-01-06	3173.07
156	68.2456	2006-01-06	4239.16
156	64.8246	2006-01-06	5249.86
156	63.7719	2006-01-06	4879.5
156	61.0526	2006-01-06	4185.6
156	63.6842	2006-01-06	3861.82
156	65.614	2006-01-06	4543.54
156	65.9649	2006-01-06	5777.36
156	67.6316	2006-01-06	4963.37
156	60.7895	2006-01-06	4148.07
156	67.9825	2006-02-06	4441.6
156	63.5965	2006-02-06	3515.95
156	71.5789	2006-02-06	4855.22
156	67.5439	2006-02-06	3855.88
156	71.4035	2006-02-06	5345.28
156	65.1754	2006-02-06	3634.55
156	75.1754	2006-02-06	4376.65
147	0	2006-09-05	2264.92
147	0	2006-09-05	1802.67
147	2.7193	2006-09-05	1947.72
147	0	2006-09-05	1499.45
147	4.12281	2006-09-05	1737.28
147	5.70175	2006-09-05	2010.55
147	0	2006-09-05	1897.3
147	45.1754	2006-11-05	3337.53
147	37.9825	2006-11-05	3563.64
147	42.3684	2006-11-05	3026.73
147	37.3684	2006-11-05	2383.58
147	35.8772	2006-11-05	2546.65
147	41.4035	2006-11-05	3173.07
147	41.3158	2006-11-05	3228.16
147	42.3684	2006-11-05	2714.63
147	39.4737	2006-11-05	3230.79
147	40.2632	2006-11-05	3329.44
147	59.4737	2006-01-06	2824.19
147	63.8596	2006-01-06	3538.34
147	53.4211	2006-01-06	2988.98
147	61.3158	2006-01-06	3648.84
147	54.2982	2006-01-06	3054.61
147	55.0877	2006-01-06	2679.53
147	58.9474	2006-01-06	2621.7
147	66.4035	2006-01-06	3321.37
147	65.5263	2006-01-06	3858.85
147	65.3509	2006-01-06	3634.55
147	65.1754	2006-02-06	3307.95
147	75.3509	2006-02-06	3790.91
147	71.4912	2006-02-06	3966.81
147	74.7368	2006-02-06	4467.76
147	68.5088	2006-02-06	3689.06
147	74.7368	2006-02-06	3888.64
147	67.1053	2006-02-06	3978.93
133	5.78947	2006-09-05	2078.64
133	3.42105	2006-09-05	2612.53
133	6.75439	2006-09-05	2633.2
133	7.89474	2006-09-05	2262.84
133	0	2006-09-05	1921.47
133	8.07018	2006-09-05	1966.62
133	0	2006-09-05	1869.67
133	0	2006-09-05	2035.66
133	8.59649	2006-09-05	1869.67
133	22.9825	2006-11-05	3006.55
133	21.4912	2006-11-05	2644.73
133	25.2632	2006-11-05	2468.63
133	24.2982	2006-11-05	2396.54
133	23.2456	2006-11-05	1951.49
133	21.7544	2006-11-05	2088.49
133	19.1228	2006-11-05	2170.45
133	51.2281	2006-01-06	2714.63
133	54.2982	2006-01-06	3356.45
133	47.3684	2006-01-06	3139.29
133	53.5088	2006-01-06	3009.07
133	45.7895	2006-01-06	3160.05
133	50.9649	2006-01-06	3173.07
133	51.9298	2006-01-06	2963.98
133	51.1404	2006-01-06	2626.3
133	58.5088	2006-02-06	3697.72
133	63.4211	2006-02-06	3092.91
133	54.1228	2006-02-06	3113.46
133	59.6491	2006-02-06	3424.59
133	65.8772	2006-02-06	3471.45
133	57.8947	2006-02-06	3507.58
133	66.0526	2006-02-06	4299.55
82	0	2006-09-05	2383.58
82	0	2006-09-05	2336.48
82	0	2006-09-05	2508.55
82	0	2006-09-05	2154.29
82	0	2006-09-05	2114.25
82	0	2006-09-05	1974.21
82	0	2006-09-05	2138.21
82	0	2006-09-05	2057.08
82	36.6667	2006-11-05	2902.12
82	33.7719	2006-11-05	3230.79
82	38.3333	2006-11-05	3981.97
82	37.7193	2006-11-05	3291.88
82	32.3684	2006-11-05	3715.08
82	33.2456	2006-11-05	3372.72
82	30.3509	2006-11-05	2453.22
82	35.2632	2006-11-05	3026.73
82	36.1404	2006-11-05	2738.2
82	35.7895	2006-11-05	3985
82	65.614	2006-01-06	4653.75
82	60.4386	2006-01-06	3123.78
82	51.8421	2006-01-06	2944.09
82	45.3509	2006-01-06	3367.29
82	59.0351	2006-01-06	3265.23
82	69.5614	2006-01-06	4480.88
82	57.6316	2006-01-06	3485.32
82	53.8596	2006-01-06	3391.77
82	61.5789	2006-01-06	4461.21
82	62.9825	2006-01-06	4195.02
82	68.5965	2006-02-06	4033.77
82	70.3509	2006-02-06	4448.13
82	69.7368	2006-02-06	3814.45
82	71.4035	2006-02-06	4425.3
82	70.7018	2006-02-06	3960.76
82	76.3158	2006-02-06
82	67.4561	2006-02-06	3493.65
113	0	2006-09-05	2244.16
113	5.78947	2006-09-05	2442.25
113	0	2006-09-05	1882.53
113	0	2006-09-05	2116.24
113	0	2006-09-05	1788.39
113	38.0702	2006-11-05	3691.95
113	39.2105	2006-11-05	4006.29
113	35.0877	2006-11-05	2919.35
113	41.4912	2006-11-05	4179.33
113	45.0877	2006-11-05	4392.83
113	40.614	2006-11-05	4289.98
113	38.8596	2006-11-05	4201.31
113	41.8421	2006-11-05
113	40	2006-11-05	3044.45
113	61.8421	2006-01-06	3313.31
113	59.7368	2006-01-06
113	67.4561	2006-01-06	4334.77
113	67.807	2006-01-06	3482.54
113	63.0702	2006-01-06
113	66.7544	2006-01-06	3257.26
113	64.2105	2006-01-06	3741.21
113	71.0526	2006-01-06
113	61.5789	2006-01-06	3502
113	60.7018	2006-01-06	3334.83
113	64.7368	2006-02-06	3744.12
113	70.614	2006-02-06	3846.98
113	72.193	2006-02-06	3972.87
113	73.3333	2006-02-06	3302.59
113	71.8421	2006-02-06	3307.95
113	68.6842	2006-02-06	5108.86
113	75.9649	2006-02-06
161	0	2006-09-05	3844.01
161	0	2006-09-05	2644.73
161	0	2006-09-05	2544.4
161	0	2006-09-05	3009.07
161	0	2006-09-05	2513.01
161	0	2006-09-05	2649.35
161	9.5614	2006-11-05	2548.9
161	10.4386	2006-11-05	2225.57
161	11.8421	2006-11-05	2416.06
161	10.8772	2006-11-05	2066.86
161	14.1228	2006-11-05	3069.89
161	14.5614	2006-11-05	0
161	36.1404	2006-01-06	1864.18
161	42.2807	2006-01-06	2821.78
161	42.3684	2006-01-06	3001.52
161	41.6667	2006-01-06	3098.04
161	44.4737	2006-01-06	3217.61
161	43.2456	2006-01-06	2544.4
161	41.6667	2006-01-06	2633.2
161	59.8246	2006-02-06	3726.68
161	59.4737	2006-02-06	3744.12
161	60.3509	2006-02-06	3879.69
161	60.8772	2006-02-06	3823.31
161	59.0351	2006-02-06	4402.55
161	53.6842	2006-02-06	2872.73
161	58.6842	2006-02-06	2833.85
165	8.15789	2006-09-05	3572.1
165	12.1053	2006-09-05	3446.59
165	10.7895	2006-09-05	4248.65
165	11.4035	2006-09-05	4226.52
165	10.5263	2006-09-05	3594.72
165	12.807	2006-09-05	3817.4
165	10.5263	2006-09-05	3249.31
165	7.10526	2006-09-05
165	48.4211	2006-11-05
165	42.7193	2006-11-05	5069.55
165	43.5965	2006-11-05	4643.66
165	48.5965	2006-11-05	4876.03
165	44.386	2006-11-05	4806.9
165	48.0702	2006-11-05
165	45.9649	2006-11-05	4464.48
165	52.193	2006-11-05	4386.35
165	71.4035	2006-01-06	4633.58
165	62.7193	2006-01-06	4120.07
165	61.8421	2006-01-06	4438.34
165	61.0526	2006-01-06	4461.21
165	64.0351	2006-01-06	4448.13
165	69.2105	2006-01-06	5573.7
165	63.7719	2006-01-06	4195.02
165	57.2807	2006-01-06	3744.12
81	0	2006-09-05	2400.87
81	0	2006-09-05	2528.67
81	0	2006-09-05	2651.67
81	0	2006-09-05	2843.54
81	0	2006-09-05	2544.4
81	0	2006-09-05	2809.74
81	0	2006-09-05	2709.93
81	0	2006-09-05	2626.3
81	0	2006-09-05	2663.25
81	28.7719	2006-11-05	2526.43
81	27.807	2006-11-05	2296.31
81	0	2006-11-05	3291.88
81	24.4737	2006-11-05
81	27.2807	2006-11-05	2468.63
81	29.2105	2006-11-05	2267.01
81	25.4386	2006-11-05	2411.71
81	26.3158	2006-11-05	3212.35
81	29.386	2006-11-05	2843.54
81	57.2807	2006-01-06	2821.78
81	58.5965	2006-01-06	2872.73
81	59.5614	2006-01-06	3340.23
81	59.8246	2006-01-06	2951.54
81	57.9825	2006-01-06	2761.91
81	56.8421	2006-01-06	2884.95
81	54.8246	2006-01-06	3476.99
81	55.4386	2006-01-06	3316
81	59.2105	2006-01-06	0
81	57.7193	2006-01-06	2788.15
166	12.2807	2006-09-05	2043.43
166	11.9298	2006-09-05	1709.51
166	8.50877	2006-09-05	2345
166	0	2006-09-05	3209.72
166	7.80702	2006-09-05	2296.31
166	11.4035	2006-09-05	2106.3
166	13.2456	2006-09-05	0
166	13.6842	2006-09-05	2603.37
166	10.8772	2006-09-05	2530.91
166	10.2632	2006-09-05	2290.01
166	18.5088	2006-11-05	2413.88
166	25.8772	2006-11-05	2290.01
166	21.3158	2006-11-05	2296.31
166	24.4737	2006-11-05	2513.01
166	24.4737	2006-11-05	2924.29
166	18.9474	2006-11-05	2327.99
166	13.4211	2006-11-05	2941.61
166	22.1053	2006-11-05	2429.13
166	24.5614	2006-11-05	2506.32
166	61.2281	2006-01-06	2444.44
166	53.8596	2006-01-06	2470.83
166	52.6316	2006-01-06	3238.72
166		2006-01-06	3085.22
166	51.3158	2006-01-06	3009.07
166	50.0877	2006-01-06	2364.24
166	50.7018	2006-01-06	2693.53
166	52.1053	2006-01-06	2877.61
166	0	2006-01-06	2674.87
110	0	2006-09-05	1813.42
110	0	2006-09-05	1902.86
110	0	2006-09-05	2033.72
110	0	2006-09-05	1959.04
110	0	2006-09-05	2025.98
110	0	2006-09-05	2074.71
110	0	2006-09-05	1763.6
110	0	2006-09-05	1999.02
110	0	2006-09-05	2184.65
110	0	2006-09-05	1728.57
110	4.21053	2006-11-05	3321.37
110	0	2006-11-05	3518.74
110	0	2006-11-05	3499.22
110	0	2006-11-05	3386.32
110	0	2006-11-05	3175.68
110	0	2006-11-05	2812.14
110	0	2006-11-05	2513.01
110	26.2281	2006-01-06	3214.98
110	23.5965	2006-01-06	0
110	28.3333	2006-01-06	3072.44
110	25.5263	2006-01-06	0
110	26.9298	2006-01-06	2800.13
110	26.3158	2006-01-06	0
110	29.5614	2006-01-06	2681.86
110	29.2982	2006-01-06	0
110	26.1404	2006-01-06	0
125	29.4737	2006-09-05	4580.08
125	32.7193	2006-09-05	0
125	30.3509	2006-09-05	0
125	29.5614	2006-09-05	4293.16
125	30.1754	2006-09-05	3930.61
125	32.6316	2006-09-05	4334.77
125	27.193	2006-09-05	0
125	27.7193	2006-09-05	4195.02
125	32.2807	2006-09-05	4321.94
125	31.5789	2006-09-05	0
125	66.8421	2006-11-05	0
125	64.1228	2006-11-05	3985
125	67.0175	2006-11-05	0
125	63.7719	2006-11-05	4606.78
125	65.3509	2006-11-05	4438.34
125	63.2456	2006-11-05	4977.44
125	63.2456	2006-11-05	0
125	58.9474	2006-11-05	0
125	70.9649	2006-01-06
125	68.6842	2006-01-06	3413.63
125	75.0877	2006-01-06	3321.37
125	0	2006-01-06	3118.62
125	70.2632	2006-01-06	0
125	78.2456	2006-01-06	3281.21
125	71.0526	2006-01-06	0
125	77.0175	2006-01-06	0
125	73.6842	2006-01-06	3126.36
9	7.19298	2006-09-05	3178.29
9	5.78947	2006-09-05	3324.06
9	5.4386	2006-09-05	2949.06
9	6.49123	2006-09-05	3052.07
9	5.52632	2006-09-05	12639.7
9	5.35088	2006-09-05	2877.61
9	5.96491	2006-09-05	2797.73
9	6.22807	2006-09-05	2698.21
9	44.9123	2006-11-05	4055.23
9	49.1228	2006-11-05
9	50.0877	2006-11-05	3651.7
9	46.3158	2006-11-05	3846.98
9	47.2807	2006-11-05	3399.95
9	43.3333	2006-11-05
9	47.4561	2006-11-05	0
9	0	2006-11-05	2929.23
9	59.7368	2006-01-06	3098.04
9	72.7193	2006-01-06
9	71.4035	2006-01-06	3100.61
9	54.9123	2006-01-06	3402.69
9	72.2807	2006-01-06	3370
9	0	2006-01-06	2981.46
9	71.4912	2006-01-06	2860.54
9	64.5614	2006-01-06	3465.92
9	70.9649	2006-01-06	2422.59
99	19.0351	2006-09-05	3443.84
99	19.8246	2006-09-05	2387.9
99	15	2006-09-05	2783.36
99	17.9825	2006-09-05	3175.68
99	18.8596	2006-09-05	2537.65
99	12.9825	2006-09-05	3513.15
99	13.2456	2006-09-05	0
99	13.5088	2006-09-05	0
99	14.2982	2006-09-05	0
99	15.8772	2006-09-05	3254.61
99	60.1754	2006-11-05	0
99	58.8596	2006-11-05	0
99	59.5614	2006-11-05	2872.73
99	52.2807	2006-11-05	2679.53
99	57.807	2006-11-05	3273.21
99	64.0351	2006-11-05	0
99	54.386	2006-11-05	0
99	59.386	2006-11-05	2926.76
99	57.8947	2006-11-05	0
99	73.5088	2006-01-06	2290.01
99	72.7193	2006-01-06	0
99	66.1404	2006-01-06	0
99	76.9298	2006-01-06	2991.48
99	67.3684	2006-01-06	3180.9
99	67.6316	2006-01-06	3183.52
99	77.193	2006-01-06	0
99	0	2006-01-06	3482.54
99	65.1754	2006-01-06	3265.23
41	5.17544	2006-09-05	2172.47
41	10.3509	2006-09-05	2172.47
41	11.3158	2006-09-05	2353.54
41	12.2807	2006-09-05	0
41	0	2006-09-05	1897.3
41	10	2006-09-05	2707.59
41	12.4561	2006-09-05	2362.1
41	9.38596	2006-09-05	2392.21
41	55.0877	2006-11-05	3660.3
41	56.2281	2006-11-05	3044.45
41	60.0877	2006-11-05	4229.67
41	58.2456	2006-11-05	3879.69
41	60.2632	2006-11-05	3861.82
41	59.386	2006-11-05	3651.7
41	63.2456	2006-11-05	4107.67
41	60.5263	2006-11-05
41	56.5789	2006-11-05	3841.05
41	50.7018	2006-11-05
41	80.614	2006-01-06	2795.33
41	74.1228	2006-01-06	4018.49
41	81.9298	2006-01-06	2860.54
41	79.2105	2006-01-06	3128.94
41	79.4737	2006-01-06	2934.18
41	81.0526	2006-01-06	2860.54
41	69.7368	2006-01-06	0
41	75.614	2006-01-06	0
41	82.7193	2006-01-06	0
41	72.2807	2006-01-06	0
158	0	2006-09-05	3749.95
158	0	2006-09-05	2591.96
158	0	2006-09-05	3075
158	0	2006-09-05	3249.31
158	0	2006-09-05	2771.43
158	0	2006-09-05	3558
158	0	2006-09-05	3820.35
158	0	2006-09-05	3054.61
158	0	2006-09-05	3041.91
158	0	2006-09-05	3026.73
158	0	2006-11-05	3963.79
158	34.9123	2006-11-05	3720.87
158	31.3158	2006-11-05	3199.22
158	30.7895	2006-11-05	2831.43
158	36.1404	2006-11-05	3744.12
158	32.1053	2006-11-05	0
158	28.9474	2006-11-05	3471.45
158	31.6667	2006-11-05	2757.16
158	31.4912	2006-11-05	3064.79
158	30.2632	2006-11-05	2894.75
158	77.4561	2006-01-05	3488.09
158	73.3333	2006-01-06	3077.55
158	75.2632	2006-01-06	3072.44
158	77.193	2006-01-06	3273.21
158	75.614	2006-01-06	3044.45
158	78.5088	2006-01-06	3246.66
158	0	2006-01-06	3149.66
158	69.2105	2006-01-06	2838.69
158	74.1228	2006-01-06	2838.69
158	72.3684	2006-01-06	3532.73
159	17.7193	2006-09-05	2174.5
159	17.193	2006-09-05	2294.21
159	18.6842	2006-09-05	2114.25
159	15.8772	2006-09-05	2444.44
159	15.7895	2006-09-05	2931.7
159	20.7018	2006-09-05	2747.67
159	20.8772	2006-09-05	2776.2
159	17.2807	2006-09-05	0
159	21.4035	2006-09-05	2396.54
159	18.4211	2006-09-05	2605.66
159	39.9123	2006-11-05	3026.73
159	42.7193	2006-11-05	3391.77
159	45.3509	2006-11-05	3310.63
159	38.8596	2006-11-05	3389.04
159	44.7368	2006-11-05	3563.64
159	40.8772	2006-11-05	2833.85
159	41.9298	2006-11-05	0
159	40.7018	2006-11-05	2795.33
159	33.2456	2006-11-05	0
159	40.1754	2006-11-05	3755.78
159	68.3333	2006-01-06	2649.35
159	64.7368	2006-01-06	2963.98
159	62.8947	2006-01-06	2530.91
159	72.1053	2006-01-06	2973.96
159	71.4912	2006-01-06	2894.75
159	71.4912	2006-01-06	2814.55
159	69.9123	2006-01-06	2850.82
159	72.807	2006-01-06	2576.04
159	58.1579	2006-01-06	2451.02
159	67.8947	2006-01-06	3183.52
